# Supplementary material
Source: HighWire-hosted journal article supplement (https://jnm.snmjournals.org/highwire/filestream/103722/field_highwire_adjunct_files/0/262068_Supplemental_Data.pdf)
Supplement: 262068_Supplemental_Data.pdf [file 262068_Supplemental_Data.pdf]

**Supplemental Figure 1. Correlations of Semiquantitative Parameters of FDHT Uptake.** SUVmax, SUVpeak and SUVmean were highly correlated.

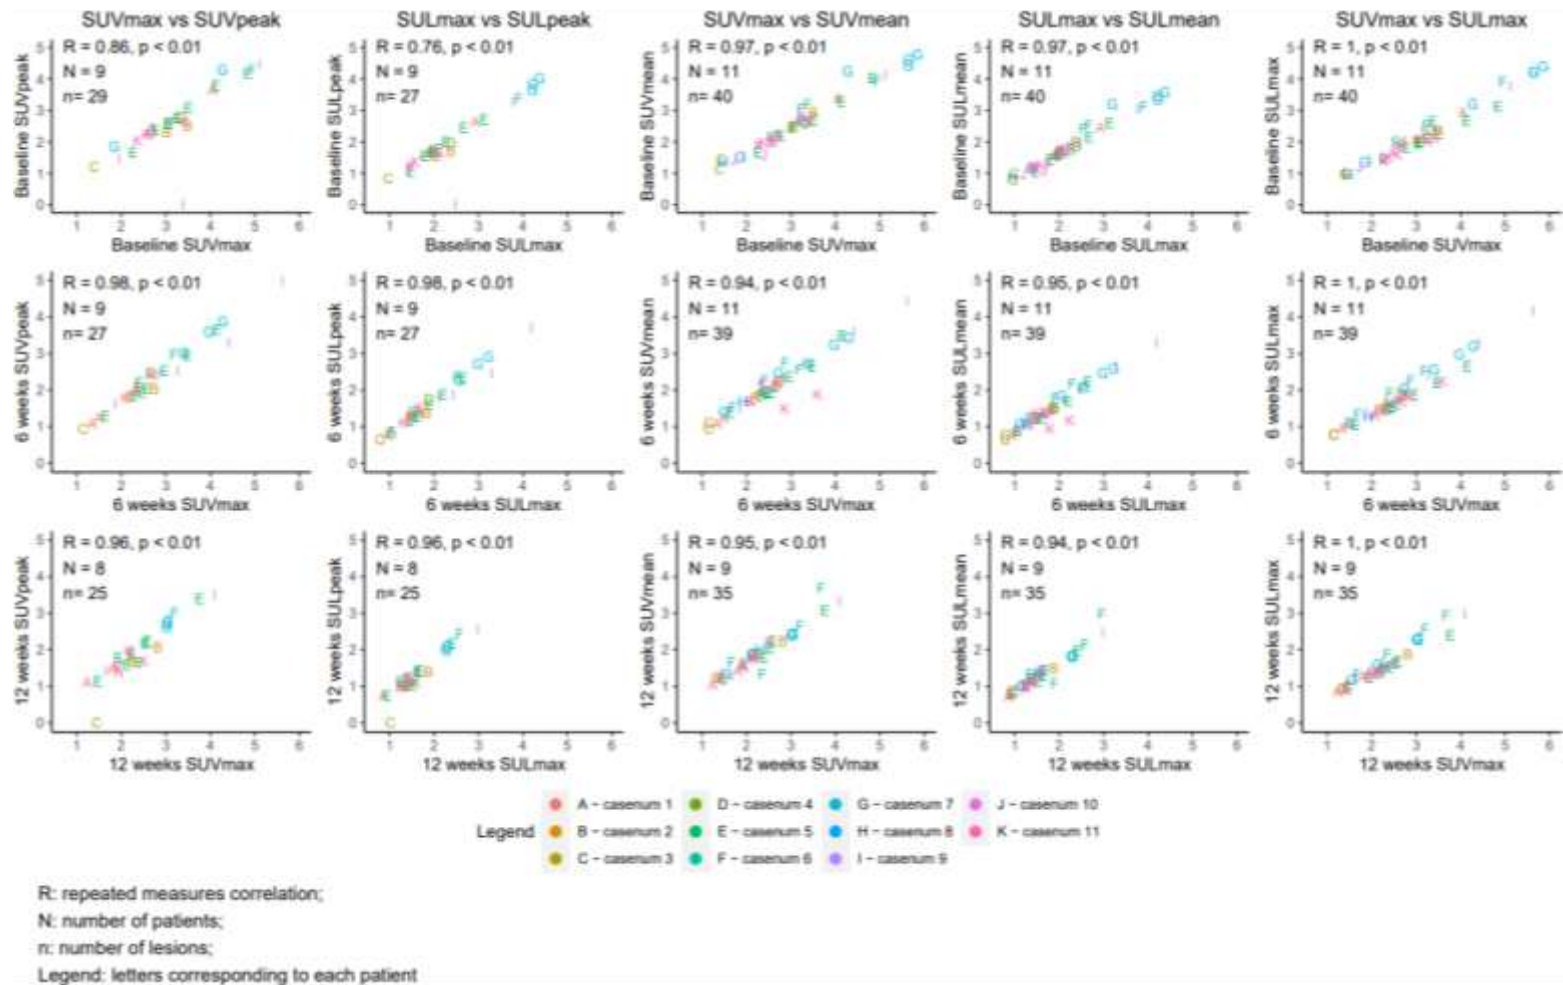

## Supplemental Figure 2. Correlation of Baseline FDHT SUVmean and Qualitative and Quantitative AR Status.

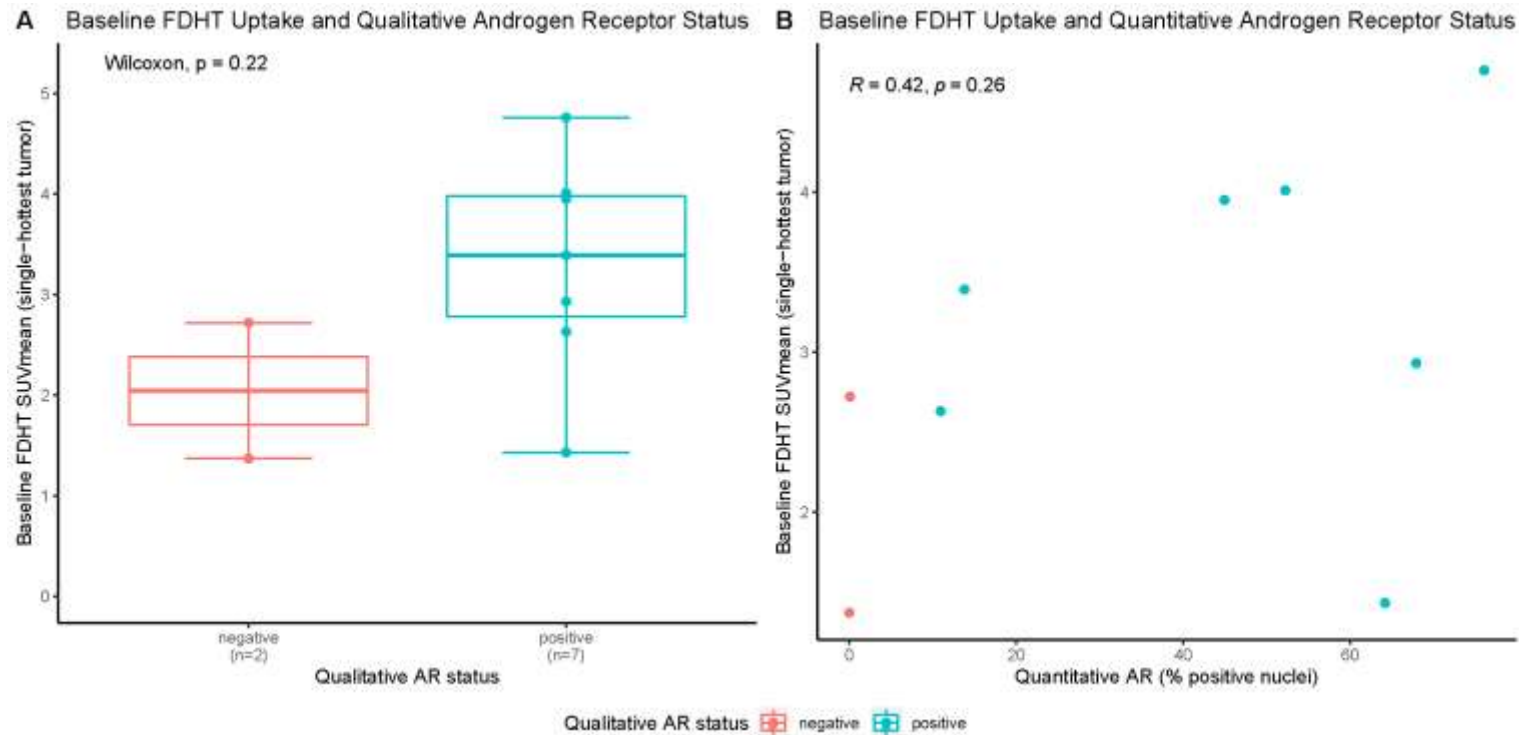

**A)** For 9 participants with archival tissue assessed for AR status, median baseline FDHT SUVmean was 3.4 (1.4-4.8) for 7 participants with AR positive tumor and 2.0 (1.4-2.7) for 2 with AR negative tumor ( $p=0.22$ ). The individual dots on the scatterplot represent individual participant's data. **B)** There was a weak correlation between quantitative AR expression levels and baseline FDHT uptake, but this was not statistically significant (Pearson  $\rho=0.42, p=0.26$ ). Blue dots represent participants with AR positive tumor. Red dots represent participants with AR negative tumor.

**Supplemental Figure 3. Clinical Benefit at 12 Weeks after Starting Therapy vs. Baseline FDHT SUVmean, summed SUVmax, and summed SUVmean.**

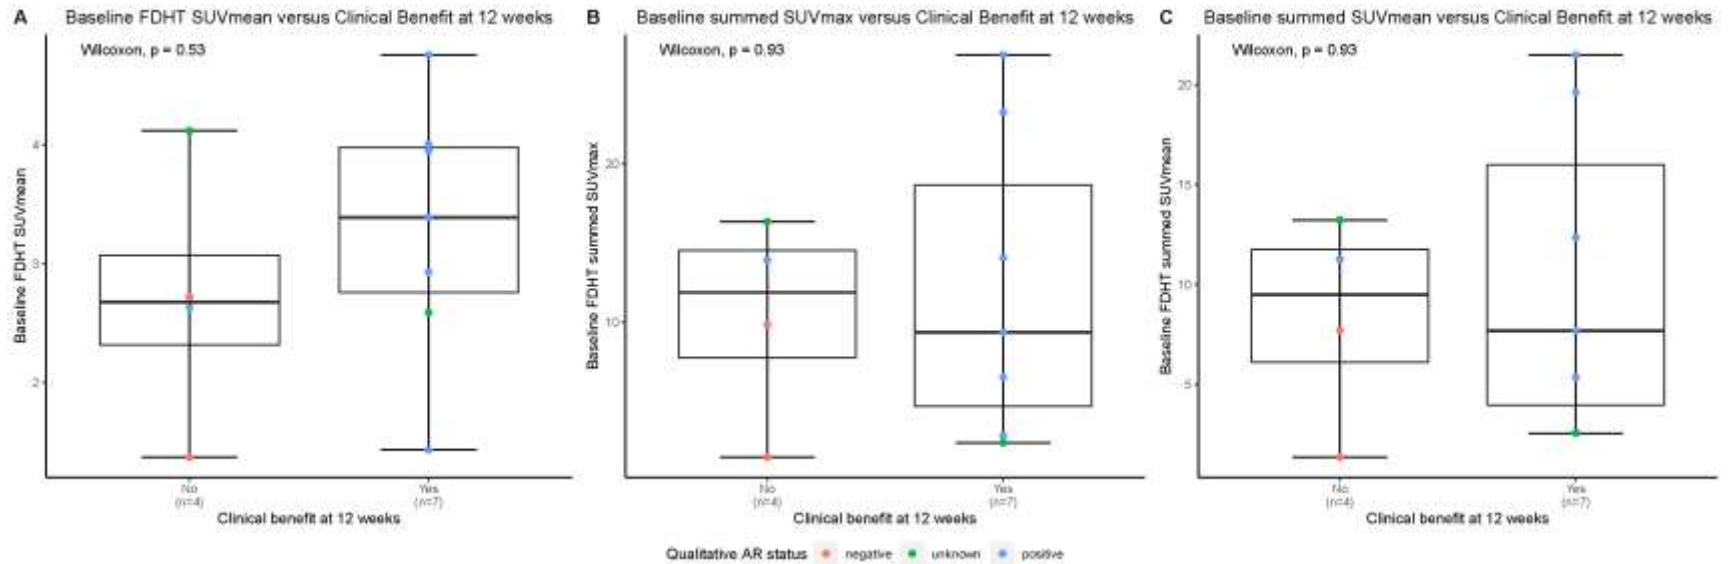

There were no significant differences between **A**) baseline FDHT SUVmean, **B**) baseline FDHT summed SUVmax, or **C**) baseline FDHT summed SUVmean and clinical benefit at 12 weeks after starting treatment with GTx-024. The individual dots on the scatterplot represent the individual participant's data.

**Supplemental Figure 4. Clinical Benefit at 12 Weeks after Starting Therapy vs. Change in FDHT Uptake: SUVmean**

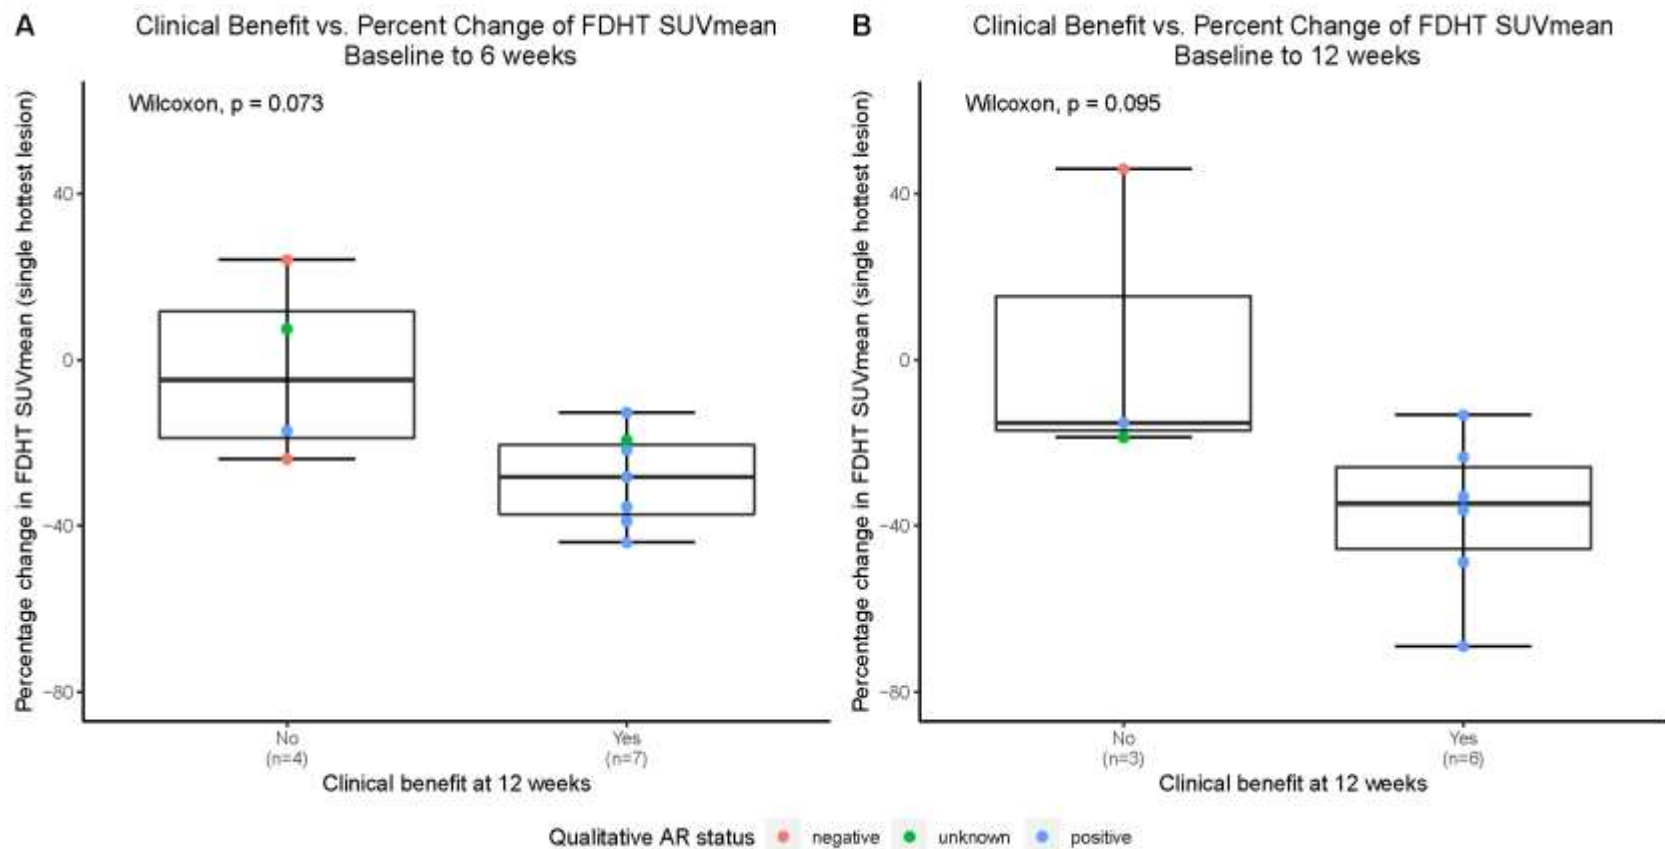

Participants with clinical benefit at 12 weeks tended to have larger declines in FDHT uptake for SUVmean (hottest lesion) at **(A)** 6 weeks after starting GTx-024 and **(B)** 12 weeks after starting GTx-024.

**Supplemental Figure 5. Clinical Benefit at 12 Weeks after Starting Therapy vs. Change in FDHT Uptake: summed FDHT SUVmax**

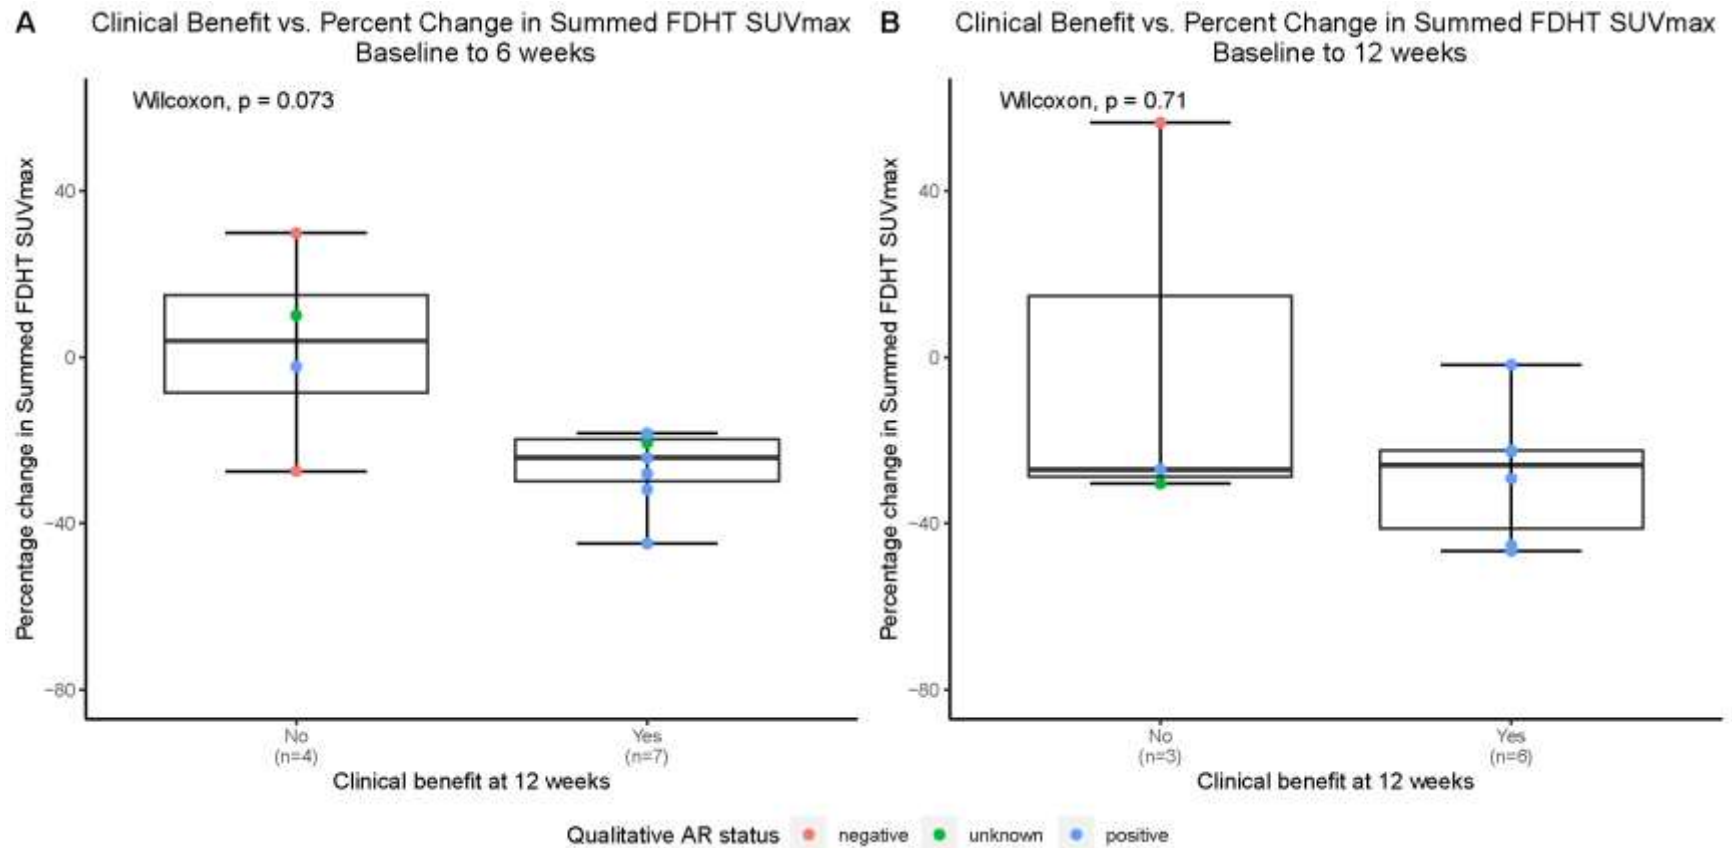

Participants with clinical benefit at 12 weeks tended to have larger declines in FDHT uptake for summed SUVmax at **(A)** 6 weeks after starting GTx-024, but not at **(B)** 12 weeks after starting GTx-024.

**Supplemental Figure 6. Clinical Benefit at 12 Weeks after Starting Therapy vs. Change in FDHT Uptake: summed FDHT SUVmean**

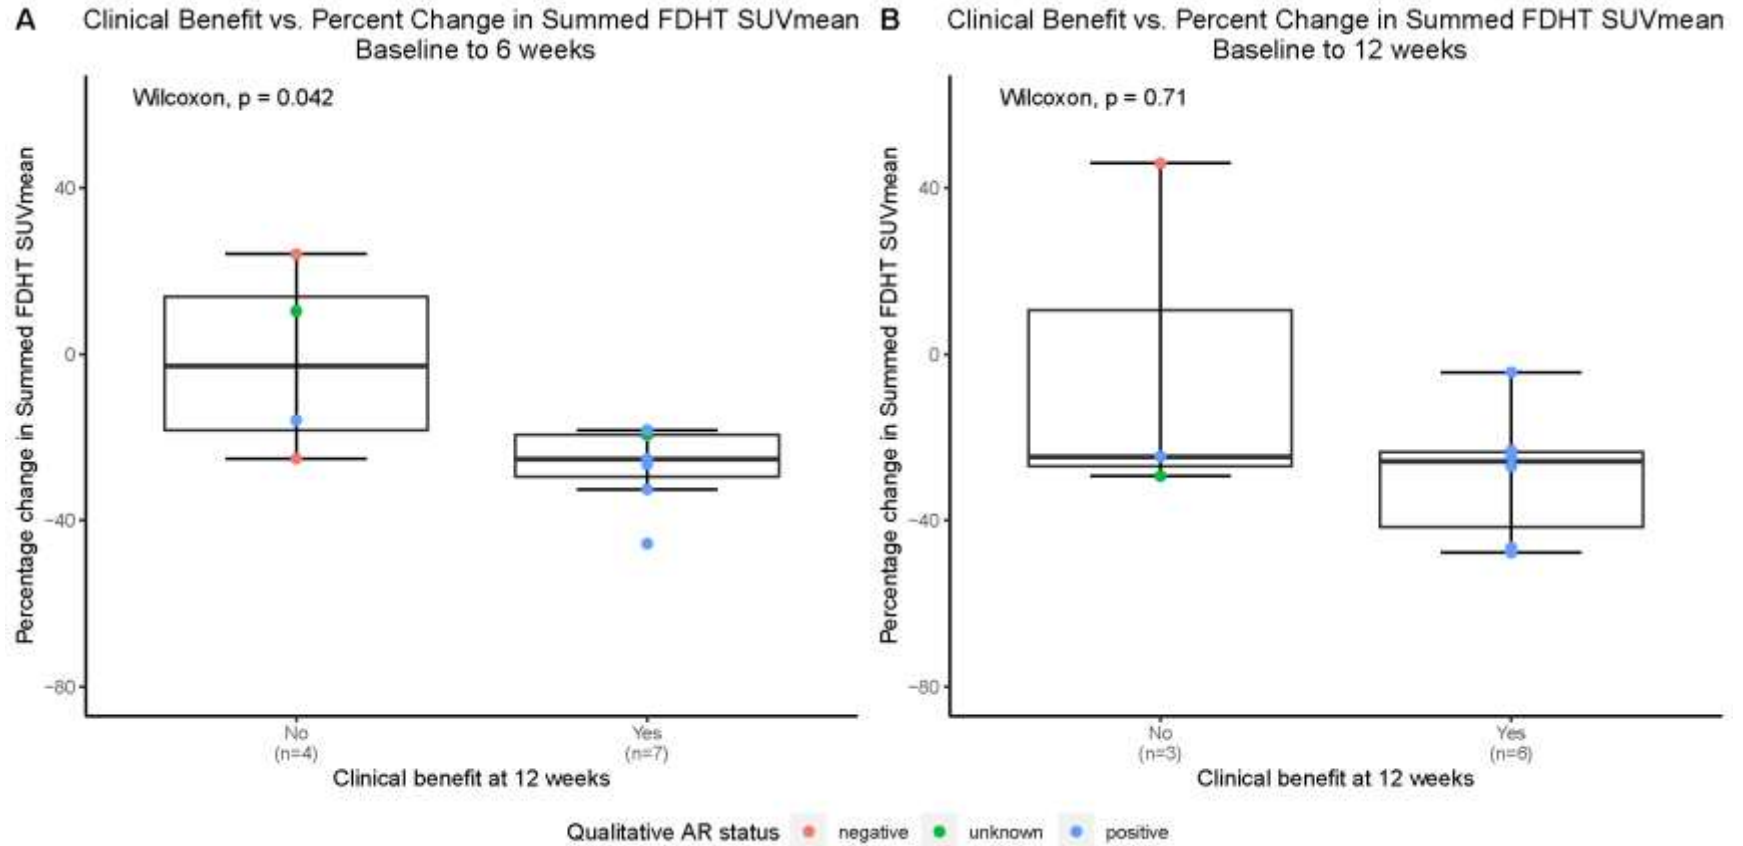

Participants with clinical benefit at 12 weeks tended to have larger declines in FDHT uptake for summed SUVmean at **(A)** 6 weeks after starting GTx-024, but not at **(B)** 12 weeks after starting GTx-024.

**Supplemental Figure 7. Clinical Benefit at 12 Weeks after Starting Therapy vs. Change in FDHT Uptake Using PERCIST-like Criteria.**

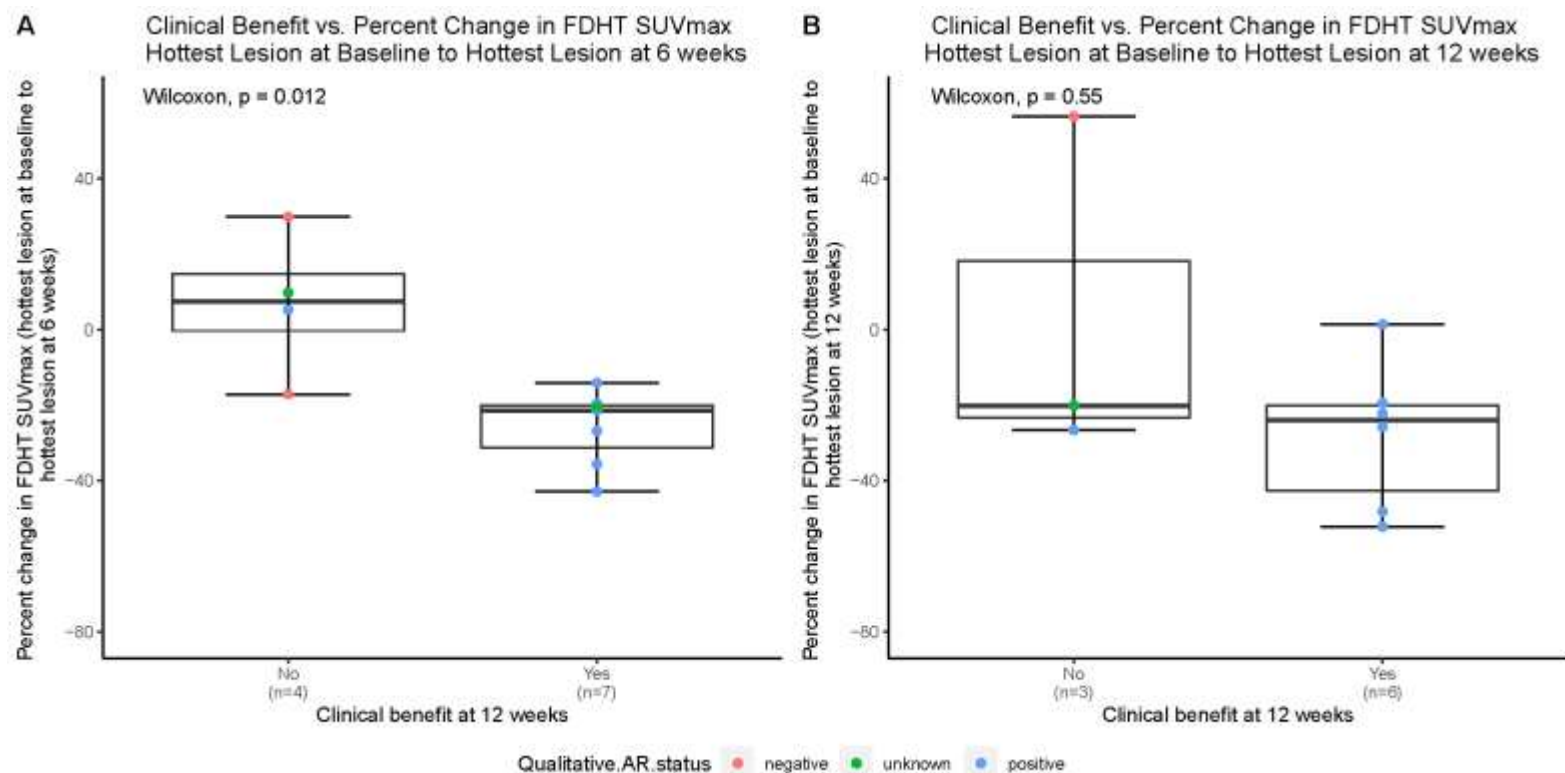

**A)** Participants with clinical benefit at 12 weeks had larger declines in FDHT SUVmax comparing the hottest lesion at baseline to the hottest lesion at week 6 (median decline 21.4%, range -42.9 to -14.1%) after starting GTx-024 compared to those with disease progression (6 weeks: increase 7.6%, range -17.1% to +29.9%,  $p=0.012$ ). **B)** No significant differences were seen comparing the change in FDHT SUVmax of the hottest lesion at baseline to the hottest lesion at week 12 after starting GTx-024 between those with and without clinical benefit ( $p>0.5$ ).

**Supplemental Figure 8. Baseline FDHT uptake in tumor vs. baseline estradiol and testosterone levels.** No correlations were observed.

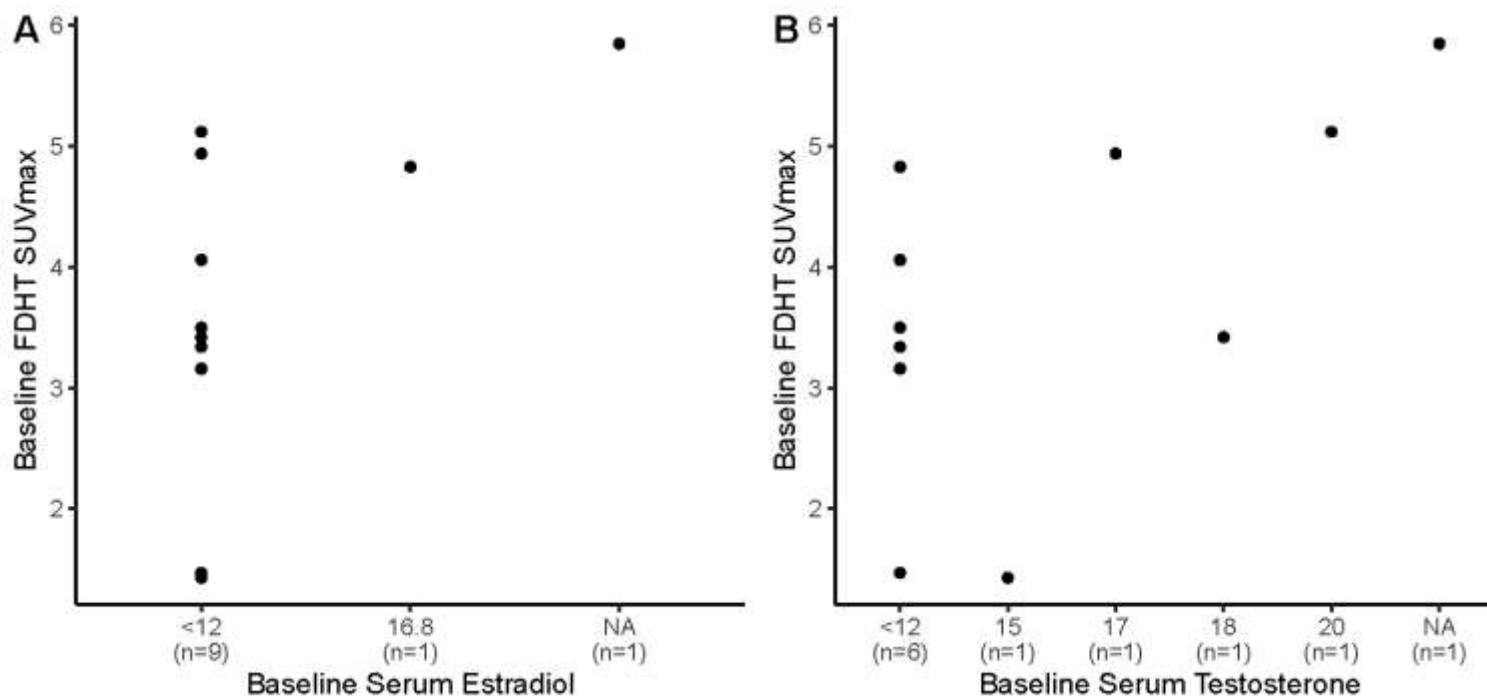



**Supplemental Figure 9. Baseline FDHT uptake in tumor vs. baseline sex-hormone binding globulin levels.** A trend towards higher baseline FDHT uptake with lower baseline sex-hormone binding globulin levels was observed.

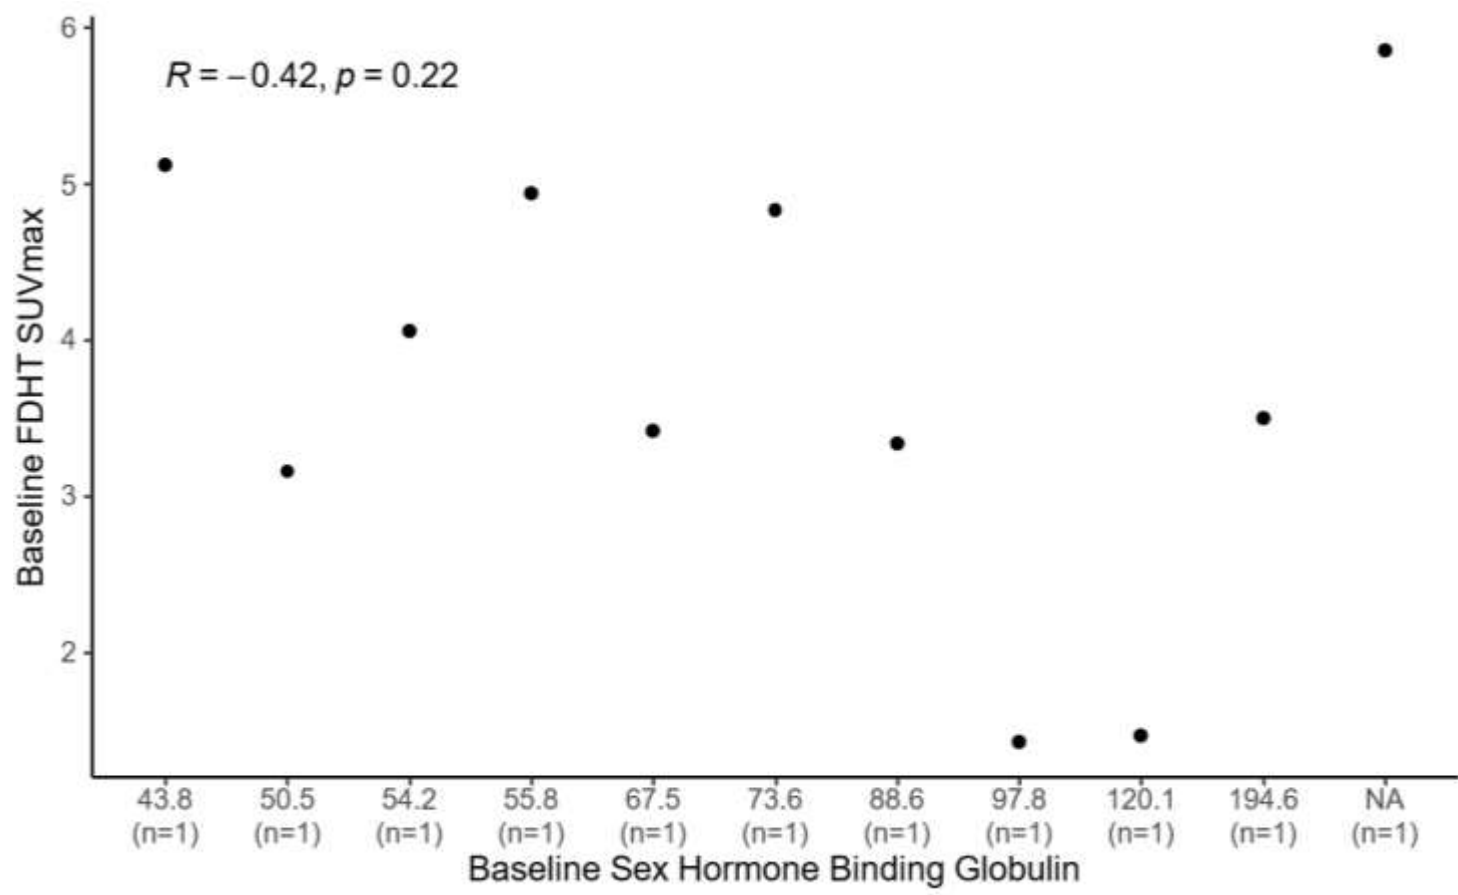

**Supplemental Figure 10. FDHT SUVmax/SHBG versus AR Status at Baseline and Clinical Benefit at 12 weeks: No correlations** were observed.

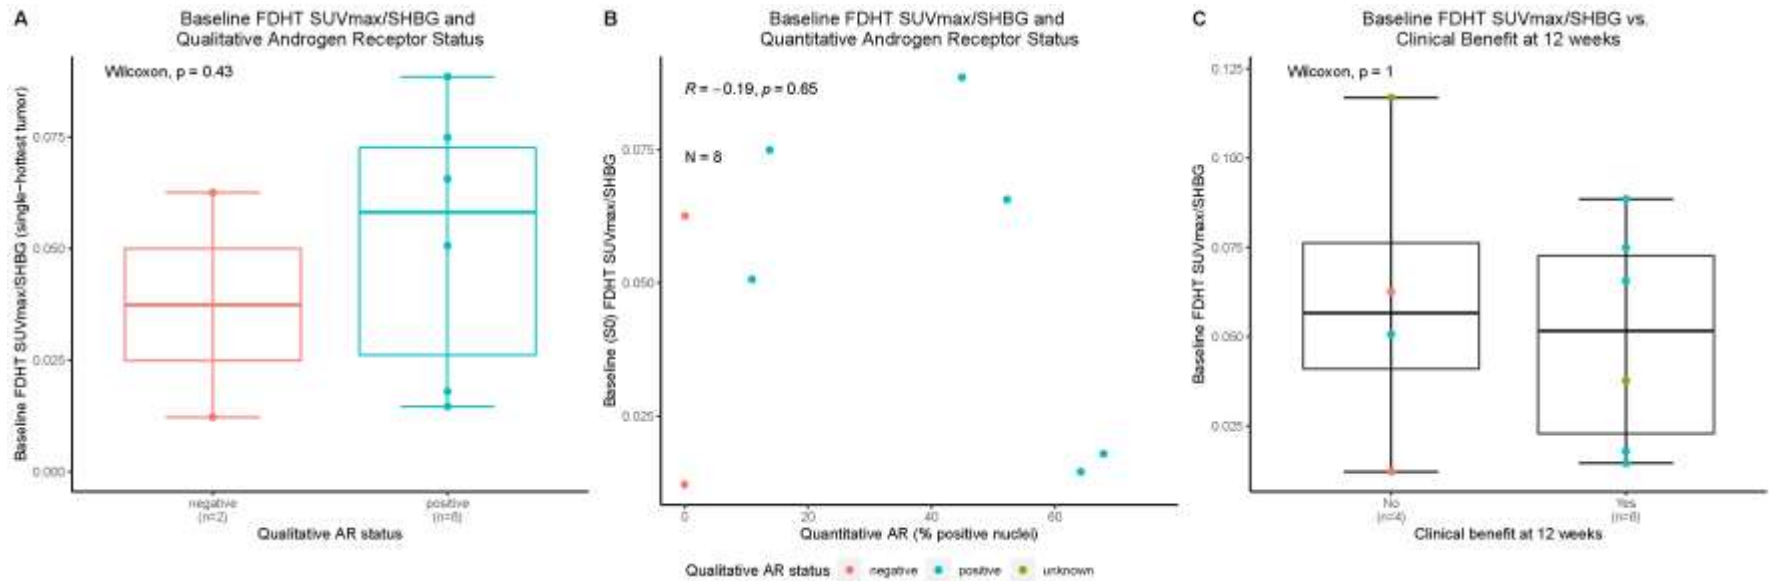

**Supplemental Figure 11. Change in PSA levels, FDHT uptake and best overall response.**

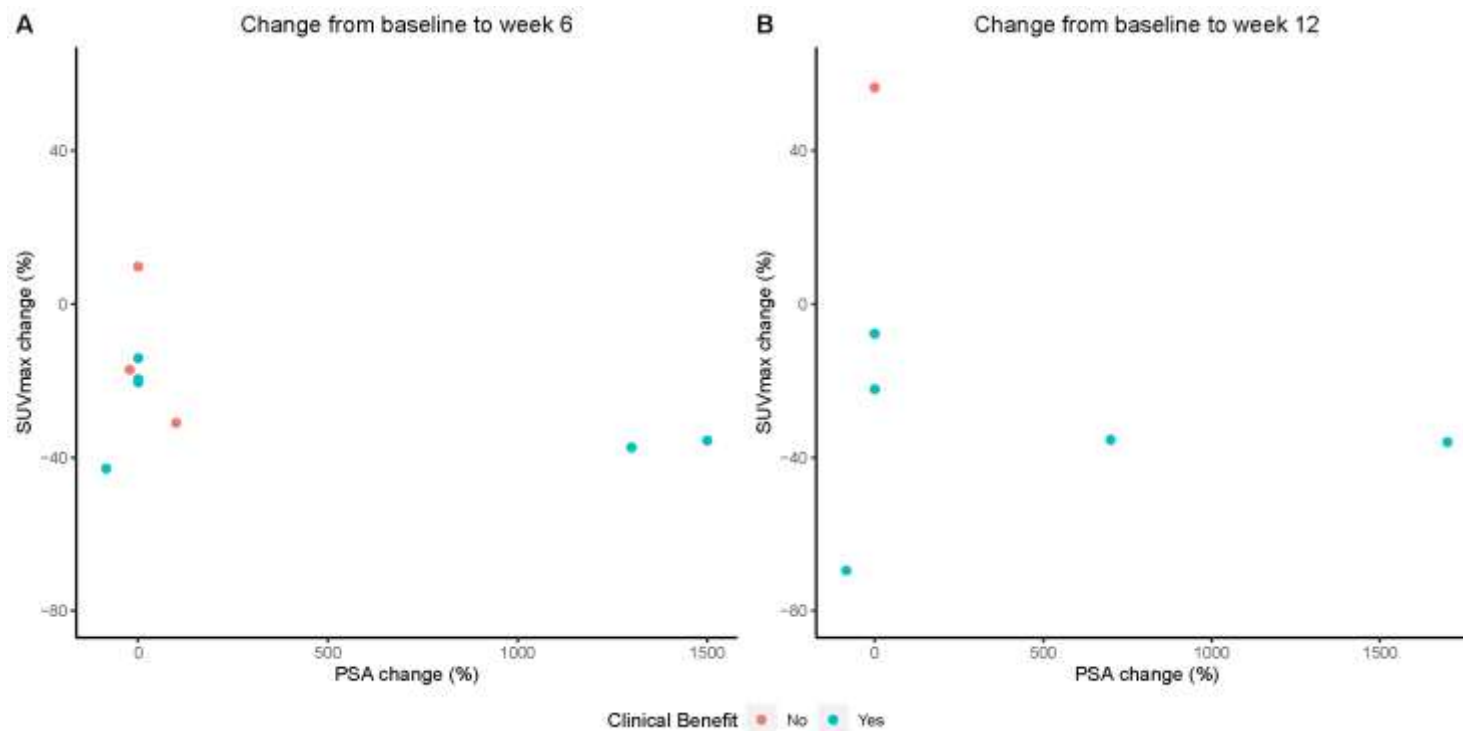

No correlations were observed. At baseline, 10 participants had PSA levels assessed. At 6 weeks after starting GTx-024, 2 participants did not have PSA assessable for change: 1 with clinical benefit and 1 without clinical benefit. At 12 weeks after starting GTx-024, 5 participants did not have PSA assessable for change: 2 with clinical benefit and 3 without clinical benefit.
